# Supplementary material for: Explore the effects of overweight and smoking on spontaneous brain activity: Independent and reverse
Source: Frontiers journal article supplement (doi:10.3389/fnins.2022.944768), 2022-10-12

**Data processing in DPARSFA**

Arrange each subject's fMRI DICOM images in one directory, and then put them in "FunRaw" directory under the working directory.

1. Add the path to the file in working directory; Enter Time points and TR; “Participants” Represents the subjects used.

Choose “EPI DICOM to NIFTI”, “Remove First 5 Time Points”, and “slice timing”.


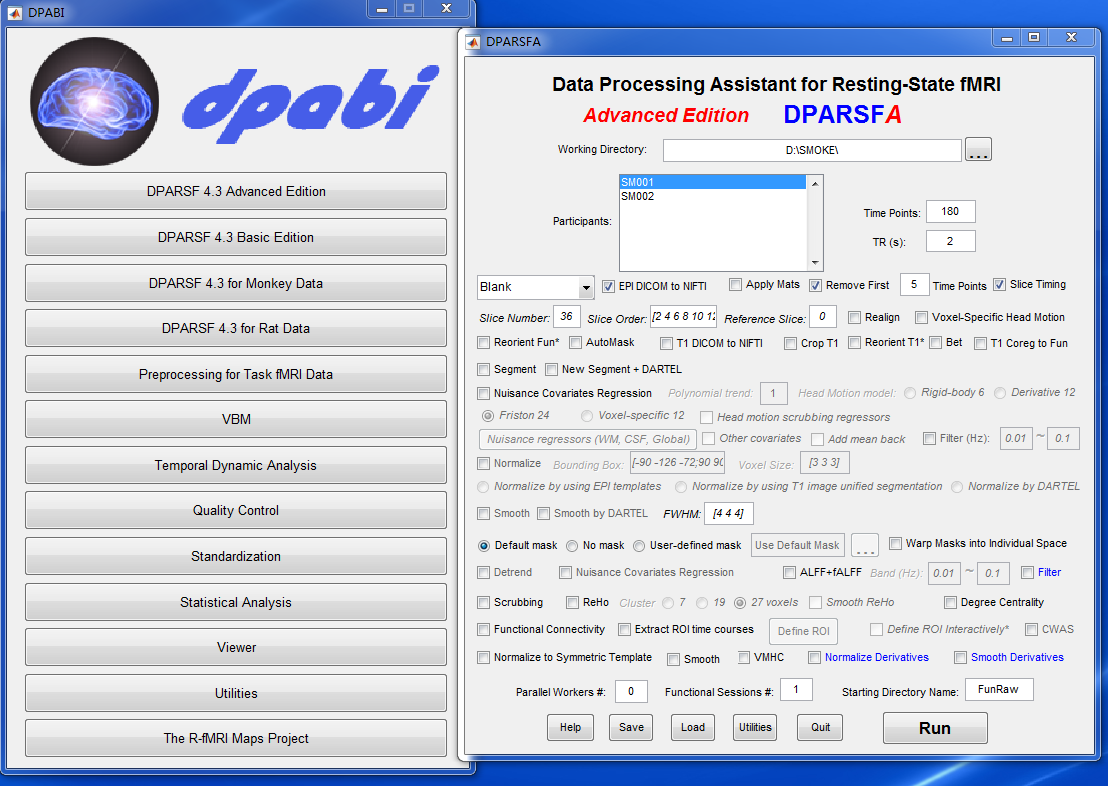


②realignment and normalize


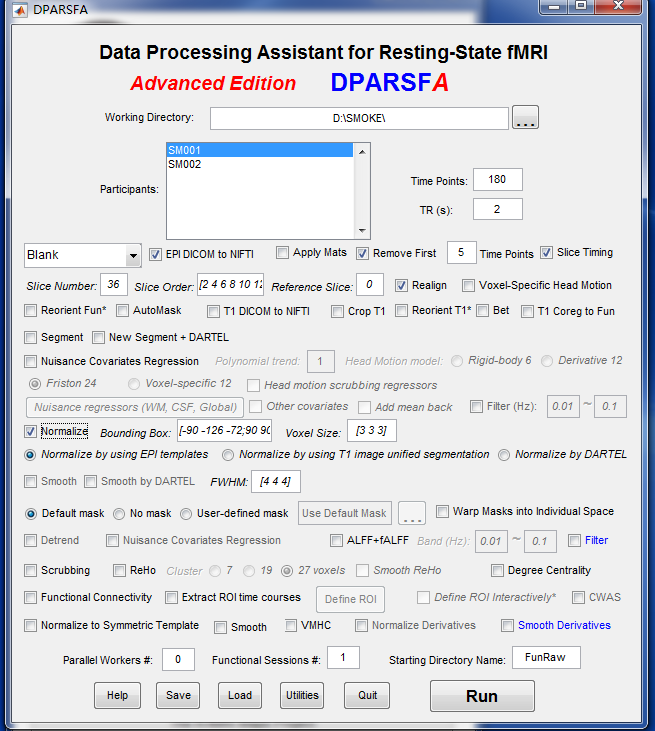


③scrubbing


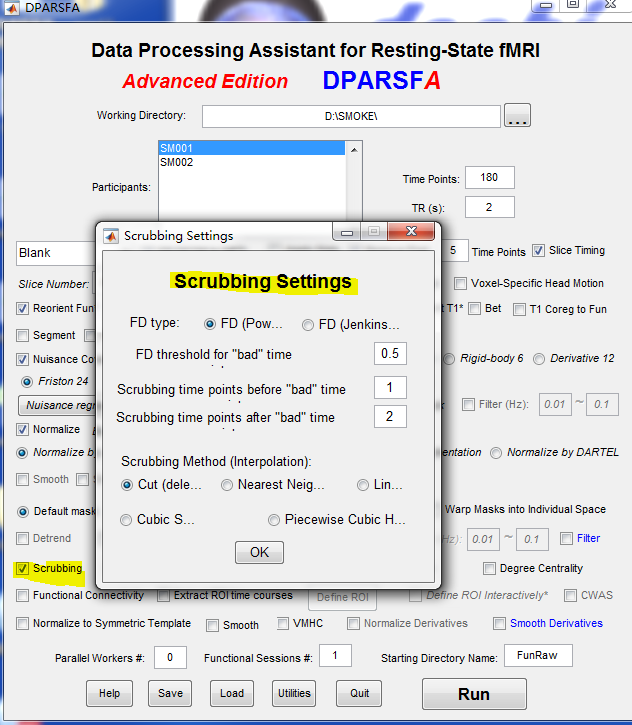


④regression


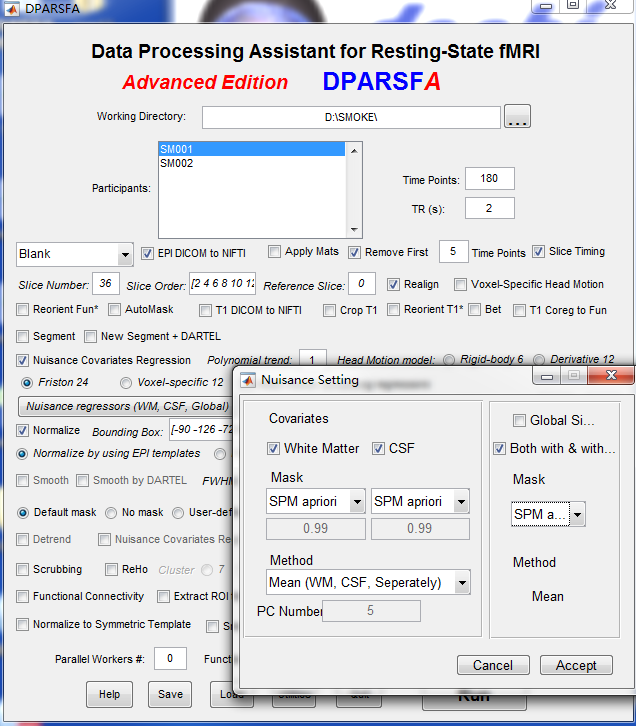


⑤smooth and detrend


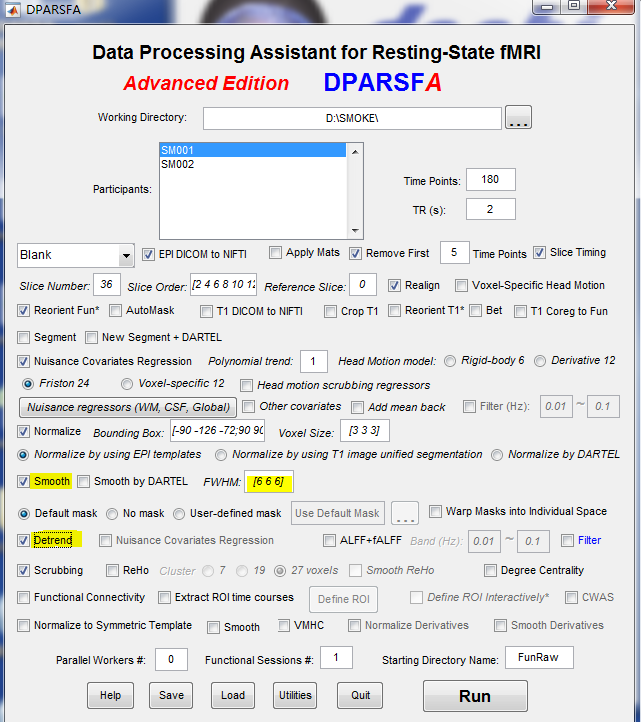


**Calculating ALFF value in REST.**


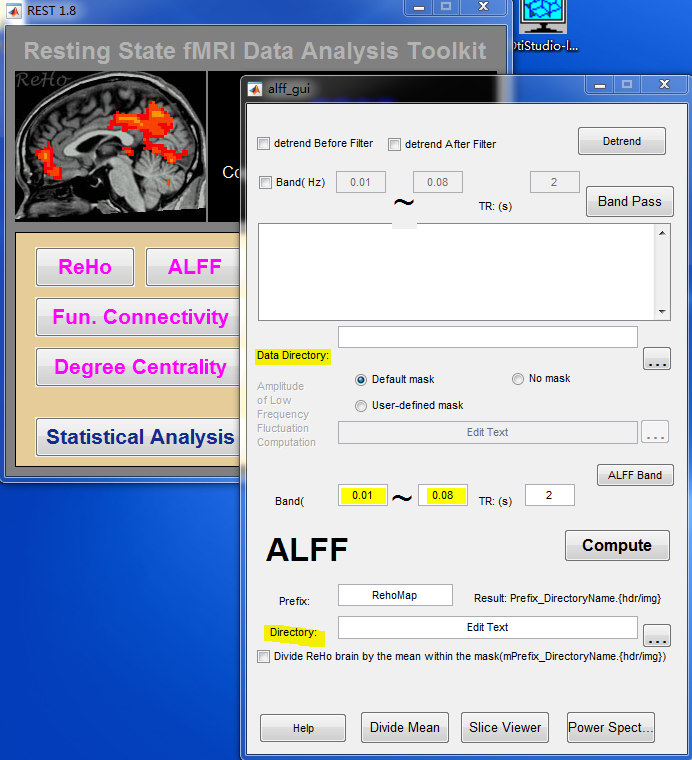

Supplement: Data_Sheet_1.ZIP [file Data_Sheet_1.ZIP]
